# Supplementary material for: Hippocampus Leads Ventral Striatum in Replay of Place-Reward Information
Source: PLOS journal article supplement (doi:10.1371/journal.pbio.1000173), 2009-08-17
Supplement: S2 (10.1371/journal.pbio.1000173.s002) [file journal.pbio.1000173.s002]

## Lansink et al., Figure S2

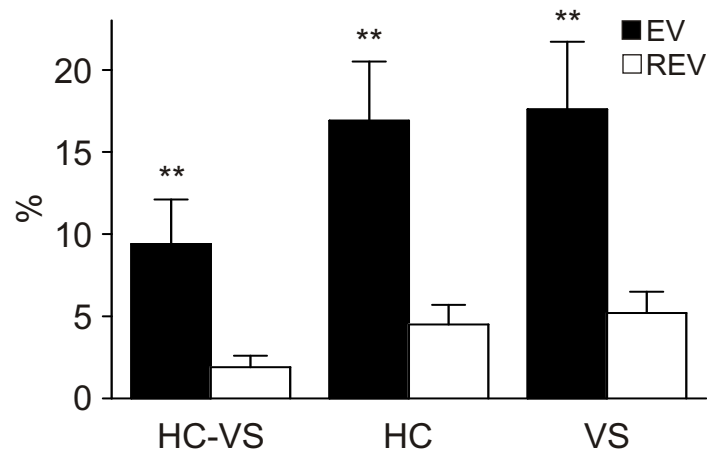

**Figure S2: Cross-structural and intra-area reactivation.** Besides cross-structurally (HC-VS;  $**p < 0.01$ ), reactivation also occurred within the hippocampus (HC) and the ventral striatum (VS). Note that for the assessment of cross-structural reactivation only cell pairs that consisted of one hippocampal and one ventral striatal unit were taken into account whereas intra-area reactivation analysis included cell pairs of which both members were recorded from the same area. Error bars indicate SEM.
